# Supplementary material for: Tetravalent Immunogen Assembled from Conserved Regions of HIV-1 and Delivered as mRNA Demonstrates Potent Preclinical T-Cell Immunogenicity and Breadth
Source: MDPI journal article supplement (doi:10.3390/vaccines8030360), 2020-07-06
Supplement: s1 [file s1]

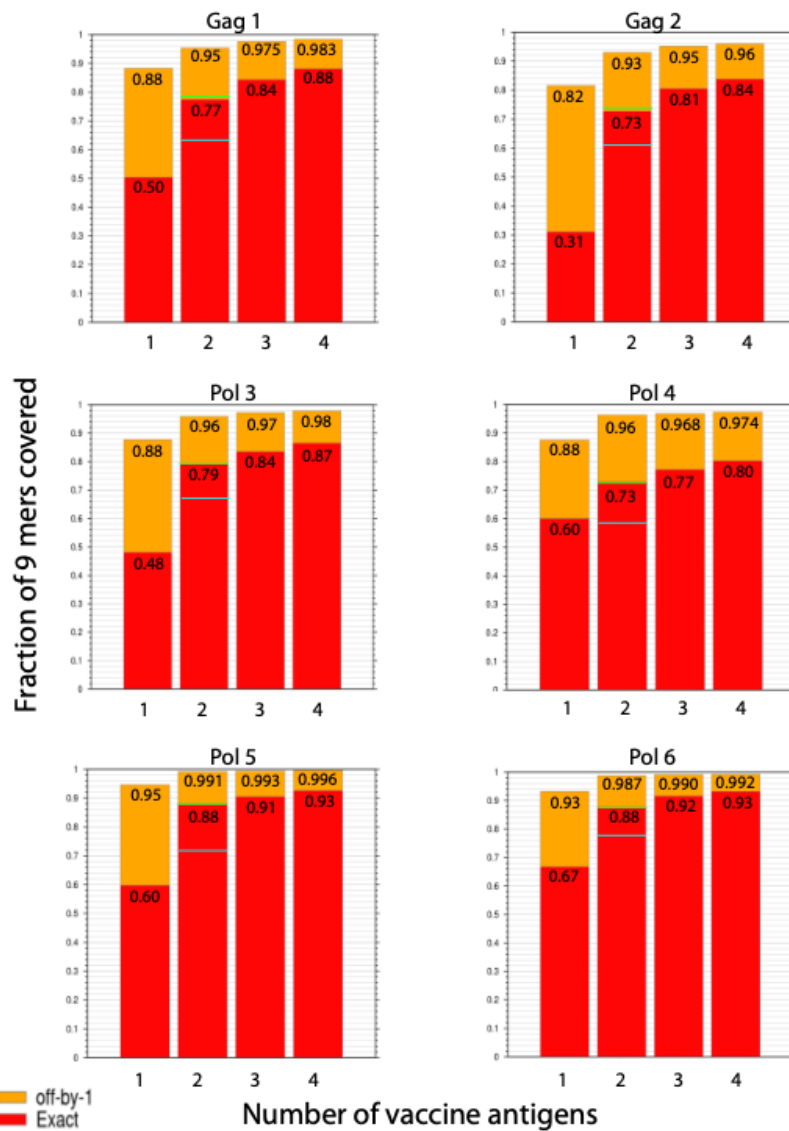

**Figure S1.** Coverage of 9-mers by the six second-generation vaccine conserved regions. Gradual improvements in the global HIV-1 coverage for the six conserved regions by increasing the valency of the vaccine cocktail form mosaic 1 (1), mosaic 1+2 (2), mosaic 1+2 + epigraph III (3) and mosaic 1+2 + epigraph III+IV (4) indicated on the x-axis. The fractions of 9-mers with an exact (red) and 8/9 (orange) matches are shown for each vaccine region separately.

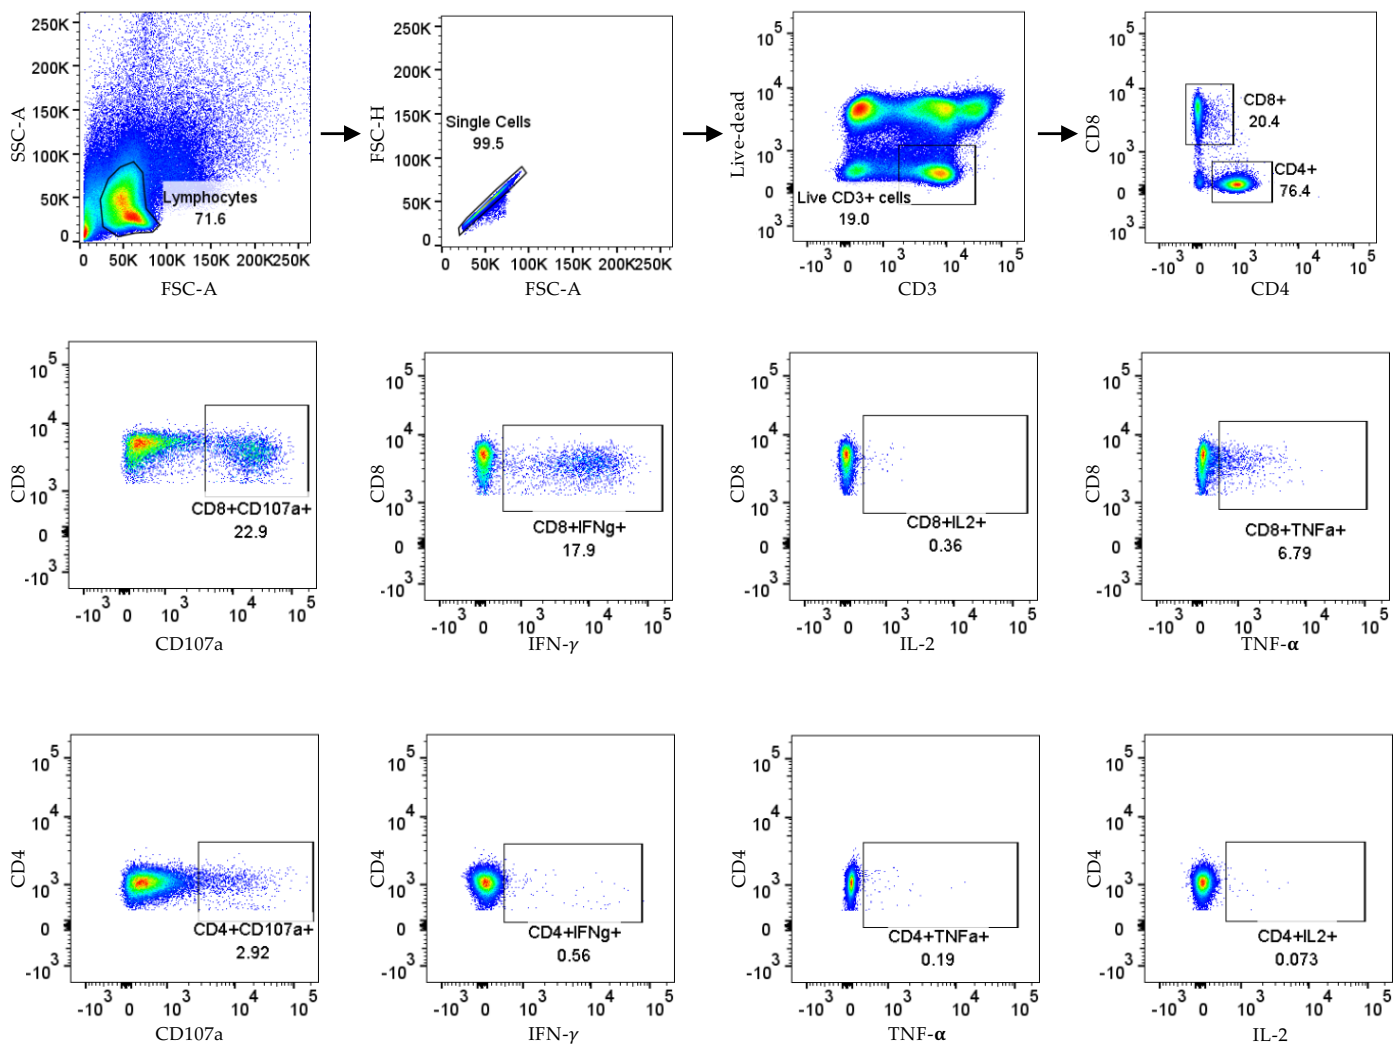

**Figure S2.** The ICS gating strategy. Gating strategy for identification of CD8<sup>+</sup> and CD4<sup>+</sup> T-cell functional phenotype within PBMCs and splenocytes.
